# Supplementary material
Source: HighWire-hosted journal article supplement (https://erj.ersjournals.com/content/50/4/1700716)
Supplement: inline-supplementary-material-3 [file inline-supplementary-material-3.pdf]

**Table S1 - Occupations and activities of all exposed patients**

| ID  | ISCO 08 classification (UN, ILO) |                                                                    | NAF 2008 Classification (France, INSEE) |                                        | DUR. (Years) | Task / additional information | Exposure                     |
|-----|----------------------------------|--------------------------------------------------------------------|-----------------------------------------|----------------------------------------|--------------|-------------------------------|------------------------------|
|     | Code                             | Occupation                                                         | Code                                    | Activity                               |              |                               |                              |
| 99  | 7 123                            | Plasterers                                                         | 4 331                                   | Plastering                             | 40           | Plasterers                    | Asbestos, PAH, Silica, Paint |
|     | 7 119                            | Building frame and related trades workers not elsewhere classified | 4 332                                   | Carpentry work (wood, plastic, metal)  | 2            | Carpenters, plasterers        |                              |
| 126 | 7 223                            | Metal working machine tool setters and operators                   | 2 932                                   | Automotive equipment manufacturing     | 17           | Car shock absorber            | PAH, Chrome                  |
|     | 3 122                            | Manufacturing supervisors                                          | 2 932                                   | Automotive equipment manufacturing     | 29           | Car shock absorber            |                              |
| 152 | 9 329                            | Manufacturing labourers not elsewhere classified                   | 2 932                                   | Automotive equipment manufacturing     | 10           |                               | Asbestos                     |
|     | 9 112                            | Cleaners and helpers in offices, hotels and other establishments   | 8 121                                   | Buildings cleaning                     | 10           |                               |                              |
|     | 9 999                            | Unemployed                                                         | 9 820                                   | Housewife                              | 17           |                               |                              |
| 181 | 7 531                            | Tailors, dressmakers, furriers and hatters                         | 1 419                                   | Clothing and Accessories Manufacturing | 6            |                               | Asbestos                     |
|     | 9 321                            | Hand packers                                                       | 2 222                                   | Plastic package manufacturing          | 4            |                               |                              |
|     | 9 999                            | Unemployed                                                         | 9 820                                   | Housewife                              | -            |                               |                              |
| 184 | 2 355                            | Other arts teachers                                                | 8 551                                   | Sport teaching                         | 32           |                               | Silica                       |
|     | 2 653                            | Dancers and choreographers                                         | 9 001                                   | Performing Arts                        | 6            |                               |                              |
|     | 7 314                            | Potters and related workers                                        | 9 003                                   | Artistic creation (arts and crafts)    | 12           | Ceramist                      |                              |
| 193 | 4 120                            | Secretaries (general)                                              | 2 442                                   | Aluminum production                    | 18           |                               | PAH                          |
| 197 | 7 211                            | Metal moulders and coremakers                                      | 2 932                                   | Automotive equipment manufacturing     | 2            | Brakes manufacturer           | Asbestos, silica, PAH, DEF   |
|     | 9 329                            | Manufacturing labourers not elsewhere classified                   | 2 932                                   | Automotive equipment manufacturing     | 1            | Tiles manufacturer            |                              |
|     | 9 329                            | Manufacturing labourers not elsewhere classified                   | 3 299                                   | Other manufacturing NOS                | 6            | Wheels tightening             |                              |
|     | 4 110                            | General office clerks                                              | 8 211                                   | Administrative and office services     | 19           | Delivery                      |                              |

|     |       |                                                     |       |                                                |    |                         |                             |
|-----|-------|-----------------------------------------------------|-------|------------------------------------------------|----|-------------------------|-----------------------------|
|     | 9 121 | Hand launderers and pressers                        | 9 601 | Laundry and dry cleaning                       | 13 | Maintenance             |                             |
| 201 | 5 164 | Pet groomers and animal care workers                | 0 150 | Culture and animal husbandry                   | 9  |                         | Asbestos,<br>Silica         |
|     | 9 239 | Manufacturing labourers not elsewhere classified    | 2 932 | Automotive equipment manufacturing             | 33 | Brakes manufacturer     |                             |
| 202 | 7 231 | Motor vehicle mechanics and repairers               | 3 317 | Transport equipments maintenance and repairing | 25 | Trucks mechanic         | Asbestos,<br>PAH,<br>DEF    |
|     | 7 231 | Motor vehicle mechanics and repairers               | 4 520 | Car maintenance and repair                     | 19 |                         |                             |
| 208 | 7 221 | Blacksmiths, hammersmiths and forging press workers | 2 420 | Steel tubes and pipes manufacturing            | 9  | Tap manufacturer        | Asbestos,<br>PAH            |
|     | 9 111 | Domestic cleaners and helpers                       | 8 121 | Buildings cleaning                             | 12 |                         |                             |
| 221 | 9 629 | Elementary workers not elsewhere classified         | 1 721 | Paper and cardboard package manufacturing      | 30 | Molding                 | Asbestos                    |
| 227 | 7 112 | Bricklayers and related workers                     | 4 399 | Builders                                       | 40 | Bricklayer              | Silica                      |
| 240 | 7 224 | Metal polishers, wheel grinders and tool sharpeners | 2 562 | Industrial Mechanic                            | 3  | Turning, milling        | PAH                         |
|     | 3 135 | Metal production process controllers                | 2 562 | Industrial Mechanic                            | 17 |                         |                             |
|     | 1 321 | Manufacturing managers                              | 2 562 | Industrial Mechanic                            | 15 |                         |                             |
| 246 | 7 421 | Electronics mechanics and servicers                 | 3 313 | Electronic and optic equipment repairing       | 16 | Public water department | Asbestos,<br>Silica,<br>PAH |
|     | 7 421 | Electronics mechanics and servicers                 | 3 313 | Electronic and optic equipment repairing       | 8  | Wastewater treatment    |                             |
|     | 2 330 | Secondary education teachers                        | 8 531 | Teaching (secondary school)                    | 1  | Sport teacher           |                             |
| 253 | 9 329 | Manufacturing labourers not elsewhere classified    | 1 399 | Textile manufacturing NOS                      | 3  |                         | Silica,<br>PAH              |
|     | 7 211 | Metal moulders and coremakers                       | 2 454 | Metal foundry                                  | 3  | Foundry (noyauterie)    |                             |
|     | 7 224 | Metal polishers, wheel grinders and tool sharpeners | 2 594 | Screw and bolt manufacturing                   | 3  | Boring                  |                             |
|     | 4 110 | General office clerks                               | 8 211 | Administrative and office services             | 28 |                         |                             |

|     |       |                                          |       |                                             |    |                     |                               |
|-----|-------|------------------------------------------|-------|---------------------------------------------|----|---------------------|-------------------------------|
|     | 9 999 | Unemployed                               | 9 820 | Housewife                                   | 9  |                     |                               |
| 254 | 7 313 | Jewellery and precious-metal workers     | 3 212 | Jewellery manufacturing                     | 44 |                     | Silica                        |
|     | 3 322 | Commercial sales representatives         | 6 831 | Real estate agency                          | 26 |                     |                               |
| 261 | 3 343 | Administrative and executive secretaries | 8 211 | Administrative and office services          | 2  |                     | PAH                           |
|     | 9 999 | Unemployed                               | 9 820 | Housewife                                   | 9  |                     |                               |
| 277 | 9 333 | Freight handlers                         | 1 629 | Wood and cork product manufacturing         | 16 | Cork manufacturer   | Asbestos, Silica, PAH, Chrome |
|     | 7 121 | Roofers                                  | 4 399 | Waterproofing work                          | 27 | Building roofs      |                               |
| 280 | 2 113 | Chemists                                 | 2 110 | Basic pharmaceutical products manufacturing | 37 |                     | Asbestos                      |
| 290 | 8 332 | Heavy truck and lorry drivers            | 4 941 | Truck transport                             | 25 | Chemicals transport | PAH, DEF                      |
|     | 8 332 | Heavy truck and lorry drivers            | 4 941 | Truck transport                             | 5  |                     |                               |
| 297 | 1 420 | Retail and wholesale trade managers      | 4 669 | Wholesale in equipments for trading         | 52 |                     | Asbestos                      |
|     | 9 334 | Shelf fillers                            | 4 711 | Shelving, inventory checking                | 11 |                     |                               |
| 300 | 4 120 | Secretaries (general)                    | 8 211 | Administrative and office services          | 4  |                     | PAH                           |
|     | 9 999 | Unemployed                               | 9 820 | Housewife                                   | 11 |                     |                               |
| 304 | 7 126 | Plumbers and pipe fitters                | 4 322 | Water and gas network installation          | 4  |                     | PAH, DEF                      |
|     | 8 332 | Heavy truck and lorry drivers            | 4 941 | Truck transport                             | 34 |                     |                               |
|     | 7 231 | Motor vehicle mechanics and repairers    | 4 520 | Car maintenance and repair                  | 5  |                     |                               |
| 316 | 5 223 | Shop sales assistants                    | 4 532 | Retail trade in automotive equipment        | 5  |                     | Asbestos, Silica, PAH, DEF    |
|     | 1 221 | Sales and marketing managers             | 4 799 | Distance selling                            | 10 |                     |                               |
|     | 1 321 | Manufacturing managers                   | 8 211 | Administrative and office services          | 20 |                     |                               |
| 320 | 9 111 | Domestic cleaners and helpers            | 8 121 | Buildings cleaning                          | 19 | Cooking             | Asbestos, PAH                 |

|     |       |                                                                  |       |                                             |    |                         |                             |
|-----|-------|------------------------------------------------------------------|-------|---------------------------------------------|----|-------------------------|-----------------------------|
|     | 9 112 | Cleaners and helpers in offices, hotels and other establishments | 8 121 | Buildings cleaning                          | 2  | Cooking                 |                             |
|     | 9 112 | Cleaners and helpers in offices, hotels and other establishments | 8 121 | Buildings cleaning                          | 2  | Cooking                 |                             |
|     | 3 212 | Medical and pathology laboratory technicians                     | 8 129 | Cleaning activity NOS                       | 1  |                         |                             |
|     | 3 212 | Medical and pathology laboratory technicians                     | 8 690 | Medical laboratory                          | 20 | Chemicals preparation   |                             |
| 322 | 9 321 | Hand packers                                                     | 3 230 | Games and toy manufacturing                 | 2  | Spray painting          |                             |
|     | 5 245 | Service station attendants                                       | 4 730 | Retail sale of fuel                         | 1  |                         |                             |
|     | 4 120 | Secretaries (general)                                            | 8 211 | Administrative and office services          | 8  |                         | PAH, DEF, Paints            |
|     | 5 169 | Personal services workers not elsewhere classified               | 9 609 | Personal services NOS                       | 3  |                         |                             |
|     | 9 999 | Unemployed                                                       | 9 820 | Housewife                                   | 26 |                         |                             |
| 323 | 4 132 | Data entry clerks                                                | 8 211 | Administrative and office services          | 31 |                         | PAH                         |
| 364 | 7 511 | Butchers, fishmongers and related food preparers                 | 1 011 | Manufacturing and storing of butcher's meat | 24 |                         |                             |
|     | 7 318 | Handicraft workers in textile, leather and related materials     | 1 419 | Clothing and Accessories Manufacturing      | 7  |                         |                             |
|     | 8 143 | Paper products machine operators                                 | 1 723 | Stationery manufacturing                    | 4  |                         | PAH                         |
|     | 5 312 | Teachers' aides                                                  | 8 560 | Teacher' aides                              | 3  |                         |                             |
|     | 5 311 | Child care workers                                               | 8 891 | Child care                                  | 2  |                         |                             |
|     | 5 152 | Domestic housekeepers                                            | 9 609 | Personal services NOS                       | 3  |                         |                             |
| 380 | 2 341 | Primary school teachers                                          | 8 520 | Teaching (primary school)                   | 37 |                         | Silica, PAH, Chrome, Paints |
| 383 | 7 212 | Welders and flamecutters                                         | 2 599 | Metal products manufacturing                | 1  | Blowpipe; scrap cutting | Asbestos                    |

|     |       |                                                    |       |                                       |    |                                |                                        |
|-----|-------|----------------------------------------------------|-------|---------------------------------------|----|--------------------------------|----------------------------------------|
|     | 7 222 | Toolmakers and related workers                     | 2 599 | Domestic metal products manufacturing | 1  | Brakes manufacturer            |                                        |
|     | 9 312 | Civil engineering labourers                        | 4 299 | Civil engineering building            | 1  |                                |                                        |
|     | 5 141 | Hairdressers                                       | 9 602 | Hairdressing                          | -  |                                |                                        |
|     | 9 999 | Unemployed                                         | 9 999 | Unemployed                            | 28 |                                |                                        |
| 402 | 3 135 | Metal production process controllers               | 2 410 | Steel Industry                        | 1  | Oven management                | Asbestos,<br>Silica,<br>PAH,<br>Chrome |
|     | 2 423 | Personnel and careers professionals                | 7 010 | Management                            | 15 | National railway society       |                                        |
|     | 2 149 | Engineering professionals not elsewhere classified | 7 010 | Management                            | 3  | Maintenance in railway tunnels |                                        |
|     | 2 423 | Personnel and careers professionals                | 7 111 | Architecture activity                 | 9  | Foreman in railway             |                                        |
|     | 2 149 | Engineering professionals not elsewhere classified | 7 112 | Engineering, technical studies        | 2  | Technical director in railway  |                                        |
|     | 2 149 | Engineering professionals not elsewhere classified | 7 112 | Engineering, technical studies        | 2  | Maintenance in railway         |                                        |
|     | 2 149 | Engineering professionals not elsewhere classified | 7 112 | Engineering, technical studies        | 1  |                                |                                        |
| 405 | 9 329 | Manufacturing labourers not elsewhere classified   | 3 213 | Fashion jewellery manufacturing       | 4  | Copper welding                 | Asbestos,<br>PAH,<br>Paints            |
|     | 5 242 | Sales demonstrators                                | 4 754 | Household retail sale                 | 5  |                                |                                        |
|     | 3 322 | Commercial sales representatives                   | 4 754 | Household retail sale                 | 5  |                                |                                        |
|     | 5 223 | Shop sales assistants                              | 4 754 | Household retail sale                 | 15 |                                |                                        |
|     | 8 350 | Ships' deck crews and related workers              | 5 020 | Boat transport                        | 10 |                                |                                        |
|     | 9 999 | Unemployed                                         | 9 999 | Unemployed                            | 3  | Houses construction            |                                        |
| 406 | 8 332 | Heavy truck and lorry drivers                      | 4 941 | Truck transport                       | 40 |                                | PAH,<br>DEF                            |
|     | 5 131 | Waiters                                            | 5 610 | Restaurant                            | 4  |                                |                                        |
| 412 | 4 120 | Secretaries (general)                              | 8 211 | Administrative and office services    | 32 |                                | PAH                                    |

|     |       |                                                               |       |                                        |    |                      |                                       |
|-----|-------|---------------------------------------------------------------|-------|----------------------------------------|----|----------------------|---------------------------------------|
| 418 | 8 152 | Weaving and knitting machine operators                        | 1 320 | Weaving                                | 1  |                      | Asbestos                              |
|     | 9 321 | Hand packers                                                  | 1 419 | Clothing and Accessories Manufacturing | 12 |                      |                                       |
|     | 8 212 | Electrical and electronic equipment assemblers                | 2 612 | Electronic circuits manufacturing      | 1  | Welding              |                                       |
|     | 9 999 | Unemployed                                                    | 9 820 | Housewife                              | -  | Housewife            |                                       |
| 423 | 7 112 | Bricklayers and related workers                               | 4 312 | Earthwork                              | 33 | Builder; plasterer   | Asbestos, Silica, PAH, Chrome, Paints |
| 438 | 7 222 | Toolmakers and related workers                                | 3 030 | Air and space construction             | 37 | Drilling; sgarpennig | PAH, Chrome                           |
| 474 | 7 231 | Motor vehicle mechanics and repairers                         | 3 040 | Military vehicles construction         | 34 |                      | Asbestos, Silica, PAH, DEF            |
|     | 7 233 | Agricultural and industrial machinery mechanics and repairers | 9 601 | Laundry and dry cleaning               | 1  | Maintenance          |                                       |
| 478 | 9 111 | Domestic cleaners and helpers                                 | 2 751 | Household equipments manufacturing     | 17 |                      | Asbestos                              |
|     | 9 321 | Hand packers                                                  | 2 751 | Household equipments manufacturing     | 9  | Welding              |                                       |
|     | 8 219 | Assemblers not elsewhere classified                           |       | Missing                                | -  |                      |                                       |
